# Supplementary material
Source: publisher site journal article supplement (https://www.dovepress.com/article/570770)
Supplement: Supplementary file 1 [file 570770%20Revised%20Tables%20S1-S3.docx]

Supplementary Material

**Table S1** Missing data summary table

| Variable | Total (n) | Missing n (%) | Handling method |
| --- | --- | --- | --- |
| Ultrasound report | 722 | 18(2.5) | Complete-case |
| Serum tumor markers | 722 | 23(3.2) | Complete-case |
| Sex hormones | 722 | 14(1.9) | Complete-case |
| Coagulation profile | 722 | 12(1.7) | Complete-case |
| Liver function | 722 | 9(1.2) | Complete-case |
| Complete blood count | 722 | 6(0.8) | Complete-case |

**Table S2** Univariate Analysis of Risk Factors for Endometrial Lesions in Postmenopausal benign ovarian tumor Patients

|  | Total, n (%) | BOT-E group, n (%) | BOT group, n (%) | OR (95%CI) | *P* |
| --- | --- | --- | --- | --- | --- |
| Cases, n (%) | 471(100.0) | 36(7.6) | 435(92.4) |  |  |
| Age at diagnosis, years, | 63.0 | 62.0 | 63.0 | 0.993 (0.952-1.037) | 0.761 |
| M(*P25~P75*) | (58.0-70.0) | (59.0-67.8) | (57.0-70.0) |
| BMI，kg/m2， | 25.0 | 25.7 | 24.9 | 1.000 (0.979-1.021) | 0.979 |
| M(*P*25~*P*75) | (22.4-27.6) | (23.4-27.4) | (22.3-27.6) |
| Age at menopause, years, | 50.0 | 51.0 | 50.0 | 1.084 (0.985-1.193) | 0.100 |
| M(*P25~P75*) | (48.0-53.0) | (48.3-52.8) | (48.0-53.0) |
| Years since menopause, years, | 13.0 | 11.0 | 13.0 | 0.978 (0.937-1.020) | 0.299 |
| M(P25~P75) | (7.0-20.0) | (5.0-18.8) | (7.0-20.0) |
| Parity, n (%) |  |  |  |  |  |
| 0 | 14(3.0) | 3(8.3) | 11(2.5) | 0.285 (0.076-1.073) | 0.063 |
| ≥1 | 457(97.0) | 33(91.7) | 424(97.5) |
| History of sterilization, n (%) |  |  |  |  |  |
| Yes | 38(8.1) | 4(11.1) | 34(7.8) | 1.473 (0.358-4.522) | 0.518a |
| No | 433(91.9) | 32(88.9) | 401(92.2) |
| History of hormone use, n (%) |  |  |  |  |  |
| Yes | 0(0.0) | 0(0.0) | 0(0.0) |  | 1.000a |
| No | 471(100.0) | 36(100.0) | 435(100.0) |
| Hypertension, n (%) |  |  |  |  |  |
| Yes | 228(48.4) | 21(58.3) | 207(47.6) | 1,542 (0.774-3.071) | 0.218 |
| No | 243(51.6) | 15(41.7) | 228(52.4) |
| Diabetes mellitus, n (%) |  |  |  |  |  |
| Yes | 84(17.8) | 5(13.9) | 79(18.2) | 0.727 (0.274-1.928) | 0.521 |
| No | 387(82.2) | 31(86.1) | 356(81.8) |
| Other cardiovascular and cerebrovascular diseases, n (%) |  |  |  |  |  |
| Yes | 124(26.3) | 6(16.7) | 118(27.1) | 0.537 (0.218-1.324) | 0.177 |
| No | 347(73.7) | 30(83.3) | 317(72.9) |
| Smoking history, n (%) |  |  |  |  |  |
| Yes | 26(5.5) | 3(8.3) | 23(5.3) | 1.626 (0.297-5.823) | 0.438a |
| No | 445(94.5) | 33(91.7) | 412(94.7) |
| Alcohol consumption history, n (%) |  |  |  |  |  |
| Yes | 470(99.8) | 36(100.0) | 434(99.8) |  | 1.000a |
| No | 1(0.2) | 0(0.0) | 1(0.2) |
| Family history of cancer, n (%) |  |  |  |  |  |
| Yes | 111(23.6) | 12(33.3) | 99(22.8) | 1.697 (0.819-3.515) | 0.155 |
| No | 360(76.4) | 24(66.7) | 336(77.2) |
| Postoperative complications, n (%) |  |  |  |  |  |
| Yes | 8(1.7) | 2(5.6) | 6(1.4) | 4.184 (0.399-24.593) | 0.119a |
| No | 463(98.3) | 34(94.4) | 429(98.6) |
| Maximum diameter of ovarian mass on ultrasound, mm | 71.0 | 82.0 | 71.0 | 1.006 (1.000-1.011) | 0.054 |
| M(*P25~P75*) | (51.0-109.5) | (53.0-150.0) | (51.0-108.0) |
| Laterality of ovarian mass on ultrasound, n (%) |  |  |  | 0.182 (0.024-1.130) | 0.068a |
| Unilateral | 411(87.3) | 35(97.2) | 376(86.4) |  |  |
| Bilateral | 60(12.7) | 1(2.8) | 59(13.6) |
| P, ng/mL, | 0.1 | 0.1 | 0.1 | 1.306 (0.700-2.437) | 0.401 |
| M(*P*25~*P*75) | (0.1-0.2) | (0.1-0.4) | (0.1-0.2) |
| T, ng/dL, | 25.6 | 27.7 | 25.6 | 1.007 (0.998-1.016) | 0.137 |
| M(*P*25~*P*75) | (18.7-33.8) | (21.8-48.2) | (18.6-33.3) |
| PRL, ng/mL, | 12.8 | 12.5 | 12.9 | 0.997 (0.971-1,024) | 0.813 |
| M(*P*25~*P*75) | (8.9-17.5) | (7.8-17.5) | (8.9-17.6) |
| CA199, U/mL, | 5.9 | 4.5 | 6.0 | 1.003 (0.996-1.009) | 0.389 |
| M(*P25~P75*) | (2.9-14.0) | (2.0-12.2) | (3.0-14.2) |
| AFP, ng/mL, | 2.8 | 3.1 | 2.7 | 0.971 (0.807-1.167) | 0.755 |
| M(*P25~P75*) | (2.0-4.0) | (2.0-4.0) | (2.0-4.0) |
| CEA, ng/mL, | 2.0 | 2.1 | 2.0 | 0.940 (0.762-1.160) | 0.565 |
| M(*P25~P75*) | (1.4-2.9) | (1.5-2.9) | (1.4-2.9) |
| HE4, pmol/L, | 46.9 | 49.2 | 46.8 | 1.003 (1.000-1.007) | 0.082 |
| M(*P25~P75*) | (36.2-62.7) | (35.3-59.2) | (36.6-62.8) |
| hCG, mIU/mL, | 1.2 | 1.2 | 1.3 | 0.779 (0.515-1.178) | 0.236 |
| M(*P25~P75*) | (1.2-2.1) | (1.2-1.8) | (1.2-2.1) |
| HGB, g/L,  （x ̅±s） | (127.3±12.7) | (128.8±10.6) | (127.2±12.9) | 1.010 (0.983-1.039) | 0.463 |
| RBC, *10^12/L, | (4.2±0.5) | (4.3±0.4) | (4.2±0.5) | 1.617 (0.743-3.517) | 0.226 |
| （x ̅±s） |
| CA125，U/mL， | 11.4 | 15.5 | 11.3 | 1.002 (0.998-1.006) | 0.244 |
| M(*P*25~*P*75) | (8.3-19.8) | (10.2-29.0) | (8.2-19.0) |
| WBC，*10^9/L， | 5.6 | 6.0 | 5.6 | 1.057 (0.966-1.156) | 0.225 |
| M(*P*25~*P*75) | (4.6-6.7) | (5.3-7.3) | (4.6-6.6) |
| NEU，*10^9/L， | 3.1 | 3.4 | 3.0 | 1.091 (0.950-1.253) | 0.219 |
| M(*P*25~*P*75) | (2.4-4.0) | (2.6-4.5) | (2.3-4.0) |
| NEU%, %, | 55.6 | 56.8 | 55.4 | 0.991 (0.964-1.018) | 0.494 |
| M(*P*25~*P*75) | (49.2-63.1) | (48.8-62.4) | (49.2-63.1) |
| TP, g/L, | 69.0 | 67.0 | 69.0 | 0.998 (0.947-1.051) | 0.932 |
| M(*P25~P75*) | (65.0-73.0) | (63.3-74.0) | (65.0-73.0) |
| ALB, g/L, | 41.0 | 41.0 | 41.0 | 1.026 (0.944-1.116) | 0.543 |
| M(*P25~P75*) | (38.0-43.0) | (38.0-44.0) | (38.0-43.0) |
| CREA, μmol/L, | 54.0 | 53.0 | 54.0 | 0.940 (0.762-1.160) | 0.565 |
| M(*P25~P75*) | (48.0-63.0) | (49.0-60.0) | (48.0-63.0) |
| GLB, g/L, | 29.0 | 27.0 | 29.0 | 0.973 (0.898-1.053) | 0.494 |
| M(*P25~P75*) | (26.0-32.0) | (26.0-31.0) | (26.0-32.0) |

a: Fisher’s exact test

**Abbreviations:**

BMI, body mass index; P, progesterone; T, testosterone; PRL, prolactin; CA199, carbohydrate antigen 19-9; AFP, alpha-fetoprotein; CEA, carcinoembryonic antigen; HE4, human epididymis protein 4; hCG, human chorionic gonadotropin; HGB, hemoglobin; RBC, red blood cell count; CA125, carbohydrate antigen 125; WBC, white blood cell; NEU, neutrophil percentage; TP, total protein; LDH, lactate dehydrogenase; ALB, albumin; CREA, creatinine; GLB, globulin

**Table S3** 95% CI for sensitivity and specificity

| Threshold Probability | Sensitivity (95%CI) | Specificity (95% CI) |
| --- | --- | --- |
| 0.0 | (1.000, 1.000) | (1.000, 1.000) |
| 0.1 | (0.861, 1.000) | (0.977, 1.000) |
| 0.2 | (0.861, 1.000) | (0.961, 0.998) |
| 0.3 | (0.833, 1.000) | (0.949, 0.993) |
| 0.4 | (0.778, 0.972) | (0.915, 0.986) |
| 0.5 | (0.750, 0.972) | (0.871, 0.979) |
| 0.6 | (0.750, 0.972) | (0.763, 0.968) |
| 0.7 | (0.667, 0.944) | (0.657, 0.932) |
| 0.8 | (0.556, 0.861) | (0.343, 0.885) |
| 0.9 | (0.444, 0.778) | (0.060, 0.740) |
| 1.0 | (0.000, 0.167) | (0.046, 0.336) |
